# Supplementary material for: The relationship of adverse childhood experiences to a history of premature death of family members
Source: Springer Nature journal article supplement (doi:10.1186/1471-2458-9-106), 2009-04-16

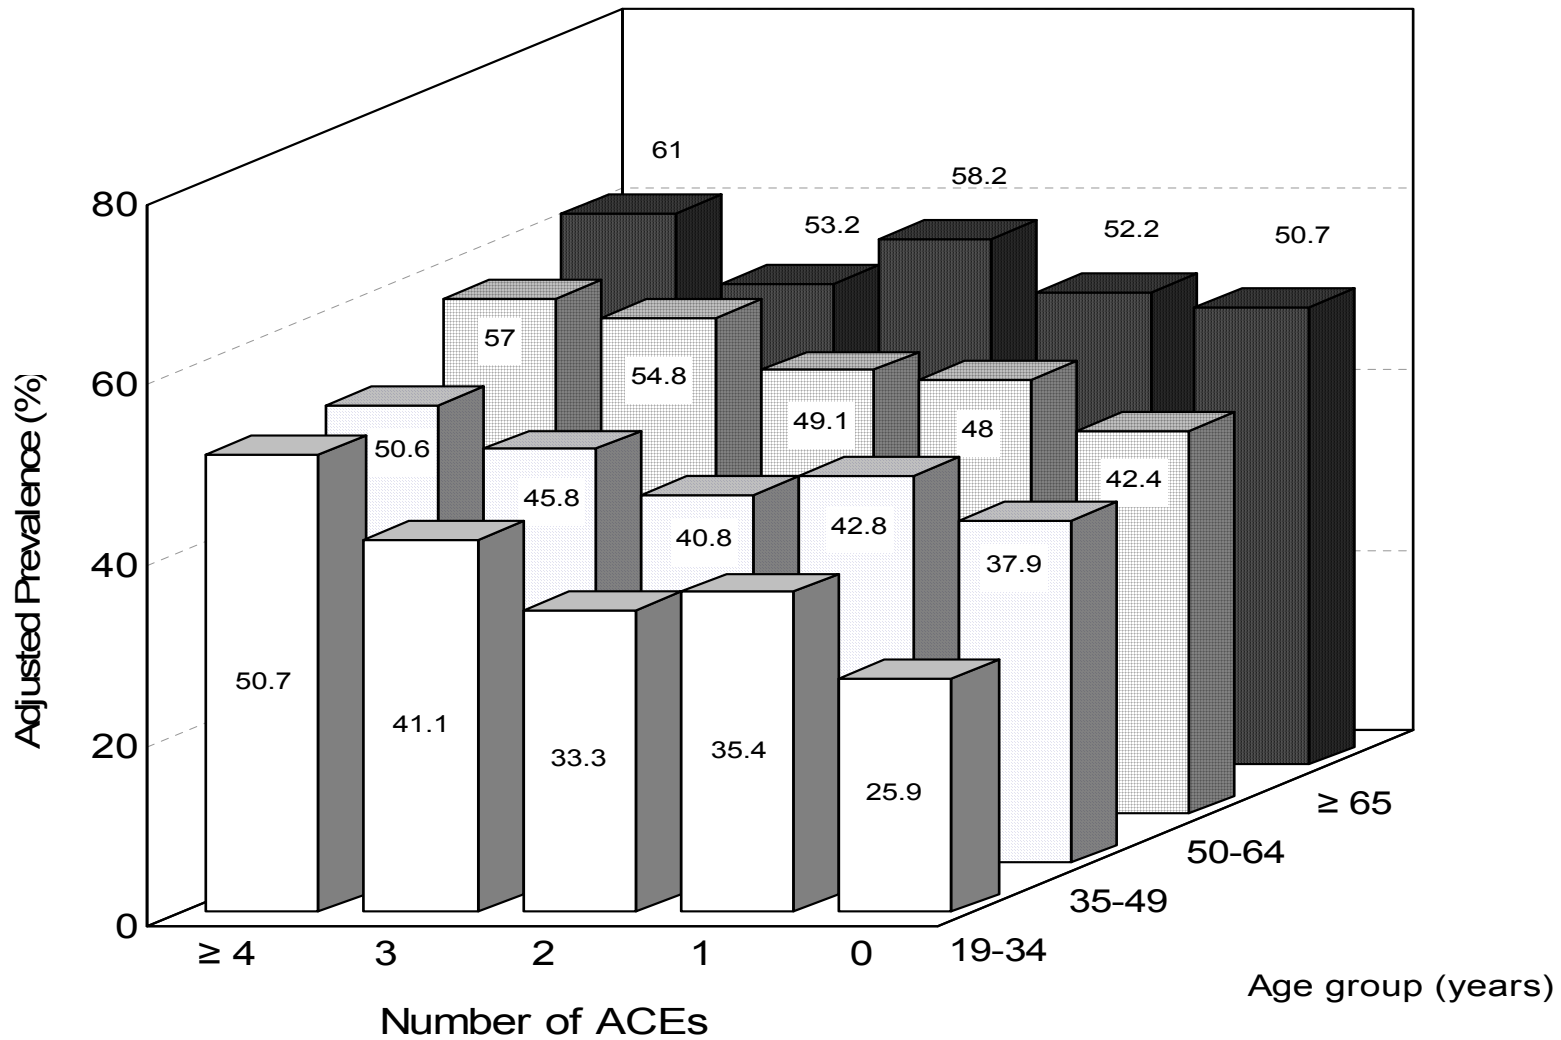

Supplement: 12889_2008_1509_MOESM1_ESM.pdf [file 12889_2008_1509_MOESM1_ESM.pdf]
